# Supplementary material for: HIV and adolescents: focus on young key populations
Source: PubMed Central journal article supplement (PMC4581085; doi:10.7448/ias.18.2.20076), 2015-02-26
Supplement: JIAS-18-19434-s001.pdf [file JIAS-18-19434-s001.pdf]

## Supplementary Material

**Table 5. Ongoing PrEP studies among young key population, young people, and key populations**

| Study name and location                                            | Estimated enrollment                                   | Age range | Include under 18 | Main study population                      | Study objective and design                                                                                                                                                                                                                                                                                                                                                                                                                                                                                                                                                                     | Progress                                                |
|--------------------------------------------------------------------|--------------------------------------------------------|-----------|------------------|--------------------------------------------|------------------------------------------------------------------------------------------------------------------------------------------------------------------------------------------------------------------------------------------------------------------------------------------------------------------------------------------------------------------------------------------------------------------------------------------------------------------------------------------------------------------------------------------------------------------------------------------------|---------------------------------------------------------|
| ADAPT (HPTN 067)<br><br>South Africa, Thailand, US (Harlem)        | 360 MSM/<br>Transgender women<br>180 Women (high risk) | 18+       | No               | MSM (Bangkok, Harlem)<br>Women (Cape Town) | Design: Phase II, Randomized, Open-Label, Pharmacokinetic and Behavioral Study<br>Overview: Identifies PrEP pill-taking schedules that participants are more likely to follow and determines if these schedules influence healthier sexual practices<br>Study arm(s):<br>- Daily: one tablet oral TVF daily regardless of sexual activity<br>- Time driven: one tablet oral TVD 2 days/week and post-exposure booster within 2 hours of sexual intercourse<br>- Event driven: one tablet oral TVD prior to sexual intercourse and a post exposure booster within 2 hours of sexual intercourse | - Started August 2011<br>- Closed to accrual May 2014   |
| Bangkok<br>Tenofovir Study<br>Open Label Extension<br><br>Thailand | 2413                                                   | 20-60     | No               | PWID                                       | Open label extension<br>Overview: Follow-on trial of daily oral TDF in PWID                                                                                                                                                                                                                                                                                                                                                                                                                                                                                                                    | - Started mid- to late-2013<br>- Expected end late-2014 |

|                                                                                                                            |                                                           |              |            |                                  |                                                                                                                                                                                                                                                                                                                                                                                                                                                                                                                                                                                                                                                                                                      |                                                                                                                                                                     |
|----------------------------------------------------------------------------------------------------------------------------|-----------------------------------------------------------|--------------|------------|----------------------------------|------------------------------------------------------------------------------------------------------------------------------------------------------------------------------------------------------------------------------------------------------------------------------------------------------------------------------------------------------------------------------------------------------------------------------------------------------------------------------------------------------------------------------------------------------------------------------------------------------------------------------------------------------------------------------------------------------|---------------------------------------------------------------------------------------------------------------------------------------------------------------------|
| <p>California Collaborative Treatment Group Consortium/ALERT (CCTG 593)</p> <p>US (Long Beach, Los Angeles, San Diego)</p> | <p>600 (testing and linkage)<br/>400 (PrEP adherence)</p> | <p>18+</p>   | <p>No</p>  | <p>MSM</p>                       | <p>Demonstration project<br/>Overview: Determines if those recently screened for HIV will accept assistance to be linked into appropriate health services. Subjects screened for HIV at any CCTG consortium site will be offered linkage to PrEP or care, depending on HIV status. HIV negative participants will also be randomized to receive a text-messaging-based adherence intervention to improve adherence to PrEP.<br/>Study arm(s):<br/>- link newly diagnosed, HIV infected persons from HIV testing sites to HIV specialist providers<br/>- link confirmed HIV negative persons with continued high risk behaviors to PrEP centers<br/>- text messaging-based adherence intervention</p> | <p>Linkage intervention<br/>- Started July 2013<br/>- Expected end July 2016<br/>Adherence intervention<br/>- Started January 2013<br/>- Expected end July 2016</p> |
| <p>CHAMPS-SA Plus Pills</p> <p>South Africa</p>                                                                            | <p>150 (Plus Pills arm)</p>                               | <p>15-19</p> | <p>Yes</p> | <p>Young men<br/>Young women</p> | <p>Demonstration project<br/>Overview: Combines HIV prevention strategies into an optimized prevention 'menu' for adolescents, including PrEP, microbicides, HIV counseling and testing and circumcision.<br/>Treatment arms: CHAMPS is comprised of three pilot studies rolled out as a series of interrelated protocols.<br/>- Modes of PrEP administration (injectable, oral and vaginal ring) "Uchoose"<br/>- Pre-exposure Prophylaxis PrEP "Plus pills"<br/>- Male circumcision "MACHO" (Males Actively Choosing Healthy Options)</p>                                                                                                                                                           | <p>- Started 2014<br/>- Expected end 2015</p>                                                                                                                       |

|                                                                           |                                                           |           |         |            |                                                                                                                                                                                                                                                                                                                                                                                                                                                                                                |                                                        |
|---------------------------------------------------------------------------|-----------------------------------------------------------|-----------|---------|------------|------------------------------------------------------------------------------------------------------------------------------------------------------------------------------------------------------------------------------------------------------------------------------------------------------------------------------------------------------------------------------------------------------------------------------------------------------------------------------------------------|--------------------------------------------------------|
| DemoPrEP<br>Brazil                                                        | 400                                                       | 18+       | No      | MSM<br>TGW | Demonstration project<br>Overview: Assesses the acceptability, feasibility and safety of daily, oral TVD as PrEP over 12 months<br>Study arm(s):<br>- TVD                                                                                                                                                                                                                                                                                                                                      | - Started January 2014<br>- Expected end January 2016  |
| The Demo Project (NIAID)<br><br>US (Miami, San Francisco, Washington, DC) | 300 (San Francisco)<br>200 (Miami)<br>100 (Washington DC) | ~25% ≤ 25 | Unknown | MSM<br>TGW | Demonstration project<br>Overview: Determines the level of community interest in PrEP, evaluates adherence to a daily prevention regimen, examines how long they stay on it, and assesses changes to sexual practices<br>Study arm(s):<br>- TVD with regular HIV testing, screening and treatment for other STIs, monitoring for PrEP drug side effects and changes in kidney function, medication adherence and HIV risk-reduction counseling, and free condoms                               | - Started October 2012.<br>- Expected end August 2014  |
| Durbar (DMSC) and Ashodaya Samithi<br><br>India                           | 2000                                                      | 18-49     | No      | TGW<br>FSW | Demonstration project<br>Overview: Assesses the use of a risk assessment tool to identify FSWs who would most benefit from PrEP, collect information about the reasons why FSWs choose to accept or decline PrEP, evaluate two different PrEP delivery strategies (weekly clinic pick-up or home delivery by peer educators every second day), monitor adherence to and discontinuation of PrEP, and evaluate unintended consequences of the use of PrEP in these communities<br>Study arm(s): | - Started November 2014<br>- Expected end October 2016 |

|                                                                        |     |       |     |                                                                          |                                                                                                                                                                                                                                                                                                                                                                                                                            |                                                                                                                                               |
|------------------------------------------------------------------------|-----|-------|-----|--------------------------------------------------------------------------|----------------------------------------------------------------------------------------------------------------------------------------------------------------------------------------------------------------------------------------------------------------------------------------------------------------------------------------------------------------------------------------------------------------------------|-----------------------------------------------------------------------------------------------------------------------------------------------|
|                                                                        |     |       |     |                                                                          | <ul style="list-style-type: none"> <li>- Peer educator deliver TVD every other day</li> <li>- Weekly clinic pick-up of TVD</li> </ul>                                                                                                                                                                                                                                                                                      |                                                                                                                                               |
| <p>East Bay Consortium/ CRUSH</p> <p>US (California)</p>               | 670 | 18-29 | No  | YMSM of color<br>TGW<br>Men/<br>women<br>with HIV<br>positive<br>partner | <p>Demonstration project</p> <p>Overview: Test and link young MSM of color to sexual health services; enhance and evaluate engagement and retention strategies for HIV positive young MSM of color; and engage and retain HIV-negative young MSM of color in sexual health services, including PrEP</p>                                                                                                                    | <ul style="list-style-type: none"> <li>- Started December 2013</li> <li>- Expected end January 2017</li> </ul>                                |
| <p>FACTS 002</p> <p>South Africa</p>                                   | 100 | 16-17 | Yes | Young women                                                              | <p>Phase II Randomized Controlled Trial</p> <p>Overview: Tests the safety and acceptability of tenofovir gel in South African young women</p> <p>Treatment arms:</p> <ul style="list-style-type: none"> <li>- TDF vaginal gel (BAT 24 dosing; one dose of gel within 12 hours before sex and a second dose of gel as soon as possible within 12 hours after sex and no more than two doses in a 24 hour period)</li> </ul> | <ul style="list-style-type: none"> <li>- Under review by South African Medicines Control Council, conditional on FACTS 001 results</li> </ul> |
| <p>HPTN 073</p> <p>US (Chapel Hill, Los Angeles, Washington, D.C.)</p> | 225 | 18+   | No  | Black MSM                                                                | <p>Open label demonstration study with PrEP + C4 model</p> <p>Overview: Assesses initiation, acceptability, safety, and feasibility of PrEP for Black MSM utilizing client-centered care coordination (C4) models</p> <p>Study arm(s):</p> <ul style="list-style-type: none"> <li>- TVD combined with C4</li> </ul>                                                                                                        | <ul style="list-style-type: none"> <li>- Started 2013</li> <li>- Expected end January 2016</li> </ul>                                         |

|                                                                   |            |                  |             |                              |                                                                                                                                                                                                                                                                                                                                                                                                                                                                                                     |                                                                                                                                 |
|-------------------------------------------------------------------|------------|------------------|-------------|------------------------------|-----------------------------------------------------------------------------------------------------------------------------------------------------------------------------------------------------------------------------------------------------------------------------------------------------------------------------------------------------------------------------------------------------------------------------------------------------------------------------------------------------|---------------------------------------------------------------------------------------------------------------------------------|
| IPERGAY<br>France,<br>Canada,<br>Germany                          | 1900       | 18+              | No          | MSM<br>TGW                   | Randomized controlled trial<br>Overview: Tests if TVD can offer protection against HIV infection if taken on an intermittent or 'on demand' basis as PrEP<br>Study arm(s):<br>- placebo<br>- on demand TVD (2 pills 2-24 hours before sex, 2 pills after sex (1 pill every 24 hours))                                                                                                                                                                                                               | - Started in France January 2012<br>- Started in Quebec July 2013<br>- Start pending in Germany<br>- Expected end December 2016 |
| Los Angeles County PATH PrEP Demo Project<br><br>US (Los Angeles) | 375 (PrEP) | 18+              | No          | MSM<br>TGW                   | Demonstration project<br>Overview: Extensive screening for HIV among populations in high disease burden locations in Los Angeles County. PrEP offered to eligible HIV-uninfected persons. Social network testing intervention among high-risk MSM, with linkage to care for newly diagnosed HIV-positive people. Tests strategies to re-engage out-of-care HIV-infected people using social networks, a peer navigation program and an intensive case management strategy<br>Study arm(s):<br>- TVD | - Started May 2013<br>- Expected end May 2017                                                                                   |
| LVCT and SWOP<br><br>Kenya                                        | Unknown    | Un-<br>know<br>n | Unkno<br>wn | MSM<br>FSW<br>Young<br>women | Demonstration project<br>Overview: Introduces PrEP into combination prevention interventions targeting young women, FSWs, and MSM. Formative                                                                                                                                                                                                                                                                                                                                                        | -<br>Formative research in planning                                                                                             |

|                                                                                                   |                          |                                                          |         |                      |                                                                                                                                                                                                                                                                                                                                                                                                                                                                       |                                                           |
|---------------------------------------------------------------------------------------------------|--------------------------|----------------------------------------------------------|---------|----------------------|-----------------------------------------------------------------------------------------------------------------------------------------------------------------------------------------------------------------------------------------------------------------------------------------------------------------------------------------------------------------------------------------------------------------------------------------------------------------------|-----------------------------------------------------------|
|                                                                                                   |                          |                                                          |         |                      | research underway to assess consumer perceptions and identify potential barriers and opportunities related to introduction. Outcomes include criteria for PrEP indication among young women and a menu of interventions for target populations, including PrEP and feasible delivery options.                                                                                                                                                                         | phase<br>- Feasibility study report results December 2013 |
| MTN 017<br><br>Peru, South Africa, Thailand, United States, Puerto Rico                           | 186                      | Unknown                                                  | Unknown | MSM<br>TGW           | Phase II safety and acceptability trial<br>Overview: Evaluates rectal safety, drug absorption and acceptability of a reduced glycerin formulation of tenofovir gel and oral TVD among MSM and TGW<br>Study arm(s): Participants follow each regimen for 8 weeks with a week break between regimens<br>- Reduced glycerin tenofovir gel used daily and before and after sex<br>- Reduced glycerin tenofovir gel used before and after sex<br>- TVD tablets taken daily | - Started September 2013<br>- Expected end 2015           |
| NEXT-PREP (HPTN 069/ACTG 5305)<br><br>US (Baltimore, Boston, Chapel Hill, Cleveland, Los Angeles, | 400 (MSM)<br>200 (women) | 18+ Sites encouraged to enroll<br>YMSM, MSM and women of | No      | MSM<br>Women at risk | Phase II Randomized, Double-Blind, Safety and Tolerability study<br>Overview: Designed to learn more about the safety and acceptability of four different drug combinations when used as PrEP by MSM and women<br>Study arm(s):<br>- Maraviroc<br>- Maraviroc + Emtricitabine<br>- Maraviroc + Tenofovir<br>- Tenofovir + Emtricitabine (TVD)                                                                                                                         | - Started July 2012                                       |

|                                                                                               |      |       |     |                                       |                                                                                                                                                                                                                                                                                                                                                                    |                                                         |
|-----------------------------------------------------------------------------------------------|------|-------|-----|---------------------------------------|--------------------------------------------------------------------------------------------------------------------------------------------------------------------------------------------------------------------------------------------------------------------------------------------------------------------------------------------------------------------|---------------------------------------------------------|
| Newark, New York, Philadelphia, Pittsburgh, San Francisco, San Juan, Seattle, Washington, DC) |      | color |     |                                       |                                                                                                                                                                                                                                                                                                                                                                    |                                                         |
| Partners Demonstration Project<br><br>Kenya, Uganda                                           | 1000 | 18+   | No  | Serodiscordant couples (mostly young) | Open label demonstration project<br>Overview: PrEP is offered as a 'bridge' until 6 months after ART initiation by the HIV-infected partner                                                                                                                                                                                                                        | - Started August 2013<br>- Expected end 2016            |
| Project PrEPare (ATN 110)<br><br>US                                                           | 200  | 18-22 | No  | YMSM                                  | Open Label Demonstration Project and Phase II Safety Study<br>Overview: Explores the safety, acceptability and feasibility of PrEP among young men who have sex with men (YMSM) who are at risk for HIV infection<br>Study arms:<br>- 2 Behavioral intervention (Many Men, Many Voices (3MV) and Personalized Cognitive Counseling (PCC)) before administering TVD | - Started November 2012<br>- Expected end November 2015 |
| Project PrEPare (ATN 113)<br><br>US                                                           | 100  | 15-17 | Yes | YMSM                                  | Open Label Demonstration Project and Phase II Safety Study<br>Overview: Designed to explore the safety, acceptability and feasibility of PrEP among young men who have sex with men (YMSM) who are at risk for HIV infection.                                                                                                                                      | - Started March 2013<br>- Expected end March 2016       |

|                                        |                            |       |    |            |                                                                                                                                                                                                                                                                                                                                                                                                                                              |                                                                                        |
|----------------------------------------|----------------------------|-------|----|------------|----------------------------------------------------------------------------------------------------------------------------------------------------------------------------------------------------------------------------------------------------------------------------------------------------------------------------------------------------------------------------------------------------------------------------------------------|----------------------------------------------------------------------------------------|
|                                        |                            |       |    |            | Study arms:<br>- 2 Behavioral intervention (Many Men, Many Voices (3MV) before administering TVD                                                                                                                                                                                                                                                                                                                                             |                                                                                        |
| PROUD<br>UK (London)                   | 500 (546 as of April 2014) | 18+   | No | MSM        | Open label pilot study for Phase IV trial<br>Overview: Assesses trial feasibility, level of interest in PrEP in clinic populations, acceptability of randomization, risk behavior over time (self-report, STIs), change in risk following behavioral interventions, adherence behavior over time, and facilitators and barriers to reducing risk and adhering to a daily pill<br>Study arm(s):<br>- TVD immediately<br>- TVD after 12 months | - Started November 2012<br>- Fully enrolled April 2014<br>- Expected end November 2015 |
| SAPPH-IRe<br>Zimbabwe                  | 800                        | 18+   | No | FSW        | Open label demonstration project of TDF/FTC<br>Overview: The demonstration project is nested within the intervention arm of a cluster randomized trial (anticipated recruitment of 800 FSW). Evaluation will use two population based surveys pre- and post-intervention in the 14 trial sites                                                                                                                                               | - Started                                                                              |
| Sibanye Health Project<br>South Africa | 200                        | 18+   | No | MSM        | Pilot study<br>Overview: Evaluates the acceptability and uptake of a combination package of biomedical, behavioral and community-level HIV prevention interventions and services for MSM in South Africa<br>Study arm(s):<br>- TVD                                                                                                                                                                                                           | - Started May 2014<br>- Expected end April 2015                                        |
| SPARK Project NYC                      | 445                        | 22-52 | No | MSM<br>TGW | Demonstration project<br>Overview: Evaluates a program in which PrEP                                                                                                                                                                                                                                                                                                                                                                         | - Started January                                                                      |



|                                                                                              |                           |         |         |                                            |                                                                                                                                                                                                                                                                                                                                                                                                                                                                                                                          |                                                |
|----------------------------------------------------------------------------------------------|---------------------------|---------|---------|--------------------------------------------|--------------------------------------------------------------------------------------------------------------------------------------------------------------------------------------------------------------------------------------------------------------------------------------------------------------------------------------------------------------------------------------------------------------------------------------------------------------------------------------------------------------------------|------------------------------------------------|
| US (New York)                                                                                |                           |         |         |                                            | is introduced, provided, and supported as part of a comprehensive prevention package. Identifies and examines social and behavioral factors associated with disparities in access to prevention and care services among gay, bisexual, and other MSM in NYC that might direct or impact PrEP implementation programs and policies.<br>Study arm(s):<br>- basic PrEP education<br>- sexual health counseling intervention                                                                                                 | 2014<br>- Expected end July 2017               |
| Sustainable Health center Implementation PrEP Pilot Study (SHIPP) (CDC Foundation)<br><br>US | 1200 (total)<br>600 (MSM) | 18+     | No      | MSM<br>Women<br>Men<br>PWID                | Health services implementation pilot study<br>Overview: Observational cohort of HIV-uninfected persons receiving daily oral PrEP at four federally qualified health centers that provide sexual health and primary care services to communities with high HIV incidence/prevalence. Studies how to incorporate the delivery of daily oral pre-exposure prophylaxis (PrEP) into the services provided by health centers serving sexually active adults at high risk of acquiring HIV infection.<br>Study arm(s):<br>- TVD | - Started June 2014<br>- Expected end May 2017 |
| VicPrEP Demonstration Project<br><br>Australia                                               | 200                       | Unknown | Unknown | Gay men<br>PWID<br>Sero-discordant couples | Demonstration project<br>Overview: Examines the effectiveness of PrEP in the local settings and the factors contributing to its success<br>Study arm(s):<br>- TVD (participant choice)<br>- no TVD (participant choice)                                                                                                                                                                                                                                                                                                  | - Expected start late 2014                     |

|                                                                                                                                                 |     |     |    |     |                                                                                                                                                             |                                                          |
|-------------------------------------------------------------------------------------------------------------------------------------------------|-----|-----|----|-----|-------------------------------------------------------------------------------------------------------------------------------------------------------------|----------------------------------------------------------|
| TAPS:<br>Expanded use of ART for treatment and prevention for female sex workers in South Africa<br><br>South Africa (Hillbrow, Waterval Boven) | 605 | 18+ | No | FSW | Demonstration project<br>Overview: Assesses whether oral PrEP and TasP can be rolled out within a combination prevention and care approach tailored to FSWs | - Started February 2014<br>- Expected end September 2016 |
|-------------------------------------------------------------------------------------------------------------------------------------------------|-----|-----|----|-----|-------------------------------------------------------------------------------------------------------------------------------------------------------------|----------------------------------------------------------|

MSM = men who have sex with men

TWG = transgender women

FSW = female sex workers

PWID = people who inject drugs

TDF= tenofovir

TVD= emtricitabine/tenofovir (FTC/TDF)
